# Supplementary material for: Can photobiomodulation therapy be an alternative to pharmacological therapies in decreasing the progression of skeletal muscle impairments of mdx mice?
Source: PubMed Central journal article supplement (PMC7423120; doi:10.1371/journal.pone.0236689), 2020-08-12
Supplement: pone.0236689.s001.pdf [file pone.0236689.s001.pdf]

### Number of fibers

| WT | Placebo-control | PBMT | Prednisone | NSAID | PBMT + Prednisone | PBMT + NSAID |
|----|-----------------|------|------------|-------|-------------------|--------------|
| 13 | 7               | 11   | 12         | 8     | 9                 | 10           |
| 14 | 6               | 11   | 12         | 8     | 9                 | 11           |
| 13 | 6               | 12   | 12         | 9     | 8                 | 11           |
| 13 | 6               | 12   | 11         | 8     | 8                 | 10           |
| 14 | 7               | 12   | 11         | 8     | 8                 | 11           |

### Centronuclear fibers

| WT | Placebo-control | PBMT | Prednisone | NSAID | PBMT + Prednisone | PBMT + NSAID |
|----|-----------------|------|------------|-------|-------------------|--------------|
| 1  | 18              | 4    | 12         | 16    | 6                 | 10           |
| 0  | 16              | 4    | 13         | 18    | 6                 | 11           |
| 0  | 19              | 6    | 12         | 18    | 6                 | 10           |
| 1  | 17              | 5    | 11         | 17    | 6                 | 12           |
| 0  | 18              | 5    | 12         | 17    | 7                 | 11           |

### Cluster nuclei

| WT | Placebo-control | PBMT | Prednisone | NSAID | PBMT + Prednisone | PBMT + NSAID |
|----|-----------------|------|------------|-------|-------------------|--------------|
| 0  | 8               | 2    | 7          | 15    | 8                 | 7            |
| 0  | 10              | 1    | 8          | 12    | 9                 | 9            |
| 0  | 8               | 2    | 8          | 12    | 9                 | 9            |
| 0  | 9               | 2    | 9          | 13    | 9                 | 11           |
| 0  | 9               | 2    | 8          | 13    | 8                 | 9            |

### Connective tissue

| WT  | Placebo-control | PBMT | Prednisone | NSAID | PBMT + Prednisone | PBMT + NSAID |
|-----|-----------------|------|------------|-------|-------------------|--------------|
| 181 | 788             | 199  | 165        | 2111  | 177               | 187          |
| 164 | 974             | 212  | 199        | 1878  | 201               | 232          |
| 208 | 878             | 195  | 183        | 1662  | 212               | 169          |
| 195 | 729             | 172  | 188        | 1869  | 188               | 193          |
| 186 | 843             | 194  | 184        | 1882  | 195               | 195          |

**Fibers size**

| <b>WT</b> | <b>Placebo-control</b> | <b>PBMT</b> | <b>Prednisone</b> | <b>NSAID</b> | <b>PBMT + Prednisone</b> | <b>PBMT + NSAID</b> |
|-----------|------------------------|-------------|-------------------|--------------|--------------------------|---------------------|
| 61        | 41                     | 51          | 55                | 44           | 44                       | 52                  |
| 59        | 39                     | 51          | 55                | 44           | 44                       | 53                  |
| 58        | 39                     | 56          | 54                | 45           | 45                       | 55                  |
| 59        | 38                     | 57          | 57                | 47           | 46                       | 54                  |
| 60        | 42                     | 55          | 53                | 41           | 45                       | 54                  |
| 57        | 40                     | 55          | 55                | 43           | 44                       | 56                  |
| 60        | 40                     | 57          | 56                | 43           | 45                       | 53                  |
| 60        | 39                     | 54          | 58                | 44           | 46                       | 55                  |
| 61        | 40                     | 55          | 52                | 41           | 43                       | 55                  |
| 60        | 40                     | 54          | 52                | 43           | 43                       | 53                  |
| 57        | 40                     | 53          | 54                | 43           | 45                       | 55                  |
| 58        | 38                     | 54          | 54                | 41           | 45                       | 53                  |
| 58        | 39                     | 58          | 56                | 44           | 44                       | 53                  |
| 61        | 38                     | 55          | 57                | 43           | 44                       | 56                  |
| 60        | 37                     | 58          | 53                | 45           | 44                       | 52                  |
| 60        | 40                     | 58          | 55                | 45           | 44                       | 57                  |
| 56        | 41                     | 57          | 55                | 42           | 46                       | 55                  |
| 62        | 38                     | 57          | 58                | 44           | 46                       | 55                  |
| 60        | 38                     | 55          | 56                | 41           | 45                       | 54                  |
| 60        | 37                     | 55          | 56                | 42           | 44                       | 57                  |
| 57        | 41                     | 53          | 54                | 43           | 46                       | 54                  |
| 58        | 40                     | 56          | 53                | 43           | 43                       | 53                  |
| 57        | 38                     | 57          | 53                | 45           | 44                       | 53                  |
| 60        | 37                     | 52          | 55                | 41           | 43                       | 55                  |
| 62        | 39                     | 53          | 55                | 41           | 44                       | 55                  |
| 63        | 40                     | 53          | 56                | 41           | 44                       | 55                  |
| 56        | 40                     | 52          | 54                | 41           | 45                       | 56                  |
| 58        | 43                     | 52          | 55                | 43           | 43                       | 52                  |
| 61        | 39                     | 53          | 56                | 44           | 46                       | 53                  |
| 60        | 38                     | 53          | 53                | 41           | 42                       | 55                  |
| 60        | 40                     | 53          | 55                | 43           | 44                       | 54                  |
| 61        | 44                     | 51          | 53                | 44           | 44                       | 56                  |
| 58        | 37                     | 52          | 54                | 45           | 44                       | 54                  |
|           | 39                     | 51          | 53                | 45           | 43                       | 54                  |
|           | 39                     | 50          | 56                | 44           | 45                       | 57                  |
|           |                        | 54          | 55                | 41           | 44                       | 54                  |
|           |                        | 52          | 56                | 42           | 45                       | 55                  |
|           |                        | 51          | 56                | 43           | 45                       | 53                  |
|           |                        |             | 54                | 44           | 45                       | 57                  |
|           |                        |             | 57                | 46           | 45                       | 54                  |
|           |                        |             | 57                | 47           | 45                       |                     |
|           |                        |             | 55                |              |                          |                     |
