# Supplementary material for: Can photobiomodulation therapy be an alternative to pharmacological therapies in decreasing the progression of skeletal muscle impairments of mdx mice?
Source: PubMed Central journal article supplement (PMC7423120; doi:10.1371/journal.pone.0236689), 2020-08-12
Supplement: pone.0236689.s002.pdf [file pone.0236689.s002.pdf]

| <b>WT</b> | <b>Placebo-control</b> | <b>PBMT</b> | <b>Prednisone</b> | <b>NSAID</b> | <b>PBMT + Prednisone</b> | <b>PBMT + NSAID</b> |
|-----------|------------------------|-------------|-------------------|--------------|--------------------------|---------------------|
|-----------|------------------------|-------------|-------------------|--------------|--------------------------|---------------------|

|     |    |    |    |    |    |    |
|-----|----|----|----|----|----|----|
| 107 | 26 | 67 | 61 | 30 | 64 | 60 |
| 87  | 20 | 75 | 52 | 12 | 70 | 56 |
| 111 | 35 | 76 | 63 | 32 | 67 | 77 |
| 94  | 28 | 61 | 51 | 20 | 59 | 57 |
| 83  | 29 | 54 | 57 | 24 | 50 | 46 |
