# Supplementary material for: Can photobiomodulation therapy be an alternative to pharmacological therapies in decreasing the progression of skeletal muscle impairments of mdx mice?
Source: PubMed Central journal article supplement (PMC7423120; doi:10.1371/journal.pone.0236689), 2020-08-12
Supplement: pone.0236689.s003.pdf [file pone.0236689.s003.pdf]

### Baseline

| Placebo-control | PBMT | Prednisone | NSAID | PBMT + Prednisone | PBMT + NSAID |
|-----------------|------|------------|-------|-------------------|--------------|
| 4               | 4    | 6          | 5     | 4                 | 5            |
| 5               | 5    | 5          | 5     | 3                 | 6            |
| 5               | 4    | 4          | 6     | 4                 | 4            |
| 4               | 4    | 3          | 6     | 5                 | 4            |
| 6               | 5    | 4          | 3     | 6                 | 5            |

### Post-treatments

| Placebo-control | PBMT | Prednisone | NSAID | PBMT + Prednisone | PBMT + NSAID |
|-----------------|------|------------|-------|-------------------|--------------|
| 5               | 20   | 6          | 5     | 8                 | 1            |
| 3               | 26   | 13         | 12    | 3                 | 12           |
| 5               | 21   | 14         | 5     | 4                 | 7            |
| 3               | 22   | 23         | 3     | 10                | 8            |
| 4               | 37   | 9          | 8     | 3                 | 3            |
